# Supplementary material for: A Zr-based metal–organic framework drug release system with long-lasting antibacterial behavior for accelerating wound healing
Source: Royal Society of Chemistry journal article supplement (doi:10.1039/d4dt02734e), 2024-01-01
Supplement: d4dt02734e1.pdf [file d4dt02734e1.pdf]

SUPPORTING INFORMATION

**A Zr-based metal-organic framework drug release system with long-lasting antibacterial behavior for accelerating wound healing**

Hui-Qian Zheng,<sup>a</sup> Han-Xiao Feng,<sup>a</sup> Bing-Xin Li,<sup>a</sup> Yi-Fei Hui,<sup>a</sup> Yi-Han Lin,<sup>a</sup> Xian-Feng Su,<sup>a</sup> Lai-Peng Yan,<sup>\*b,c,d</sup> Zijie Zhou,<sup>b,c,d</sup> Zu-Jin Lin,<sup>\*a</sup> and Faqiang Tang<sup>\*b,c,d</sup>

<sup>a</sup> Department of Applied Chemistry, College of Life Sciences, Fujian Agriculture and Forestry University, Fuzhou 350002, P. R. China.

<sup>b</sup> Shengli Clinical Medical College of Fujian Medical University, Fuzhou, 350001, P. R. China. E-mail: yanlaipeng@fjmu.edu.cn; faqiangtang@fjmu.edu.cn.

<sup>c</sup> Orthopedic and Sports Medicine Center, Fujian Provincial Hospital, Fuzhou, Fujian, 350001, P. R. China.

<sup>d</sup> Orthopedic and Sports Medicine Center, Fuzhou University Affiliated Provincial Hospital, Fuzhou, Fujian, 350001, P. R. China.

\*Author to whom correspondence can be addressed: yanlaipeng@fjmu.edu.cn, faqiangtang@fjmu.edu.cn, and linzujin@fafu.edu.cn.

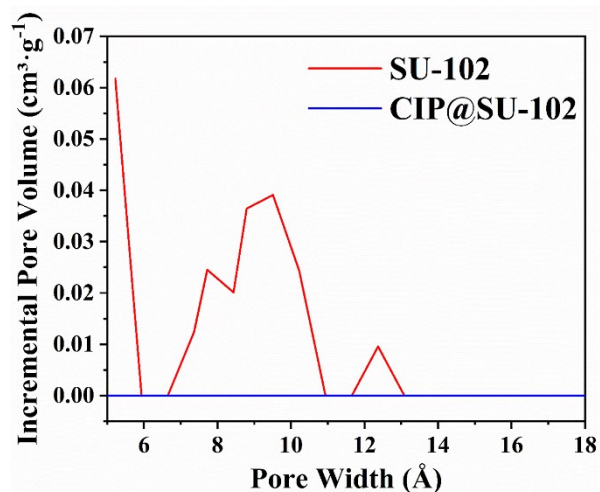

**Fig. S1** Pore distribution of SU-102 and CIP@SU-102 derived from N<sub>2</sub> sorption isotherms by DFT model.

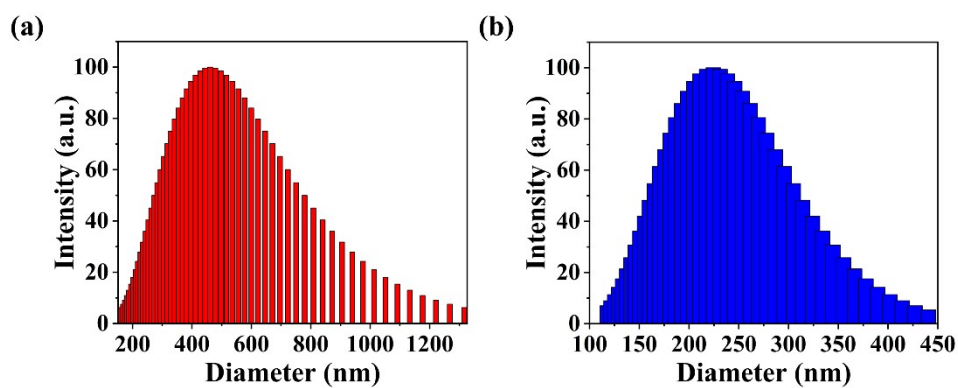

**Fig. S2** Particle size distributions of (a) SU-102 and (b) CIP@SU-102.

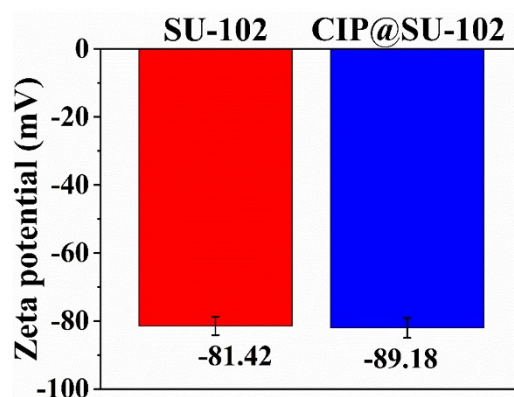

**Fig. S3** Zeta potential of SU-102 and CIP@SU-102.

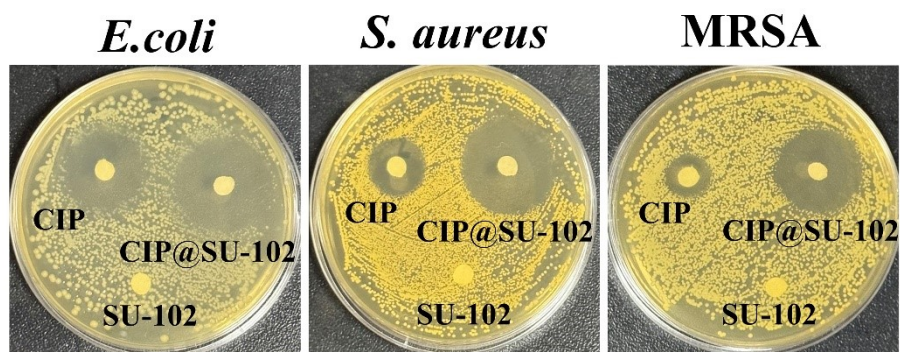

**Fig. S4** Inhibition zone experiments of SU-102, CIP@SU-102 and CIP against *E. coli*, *S. aureus* and MRSA, respectively.

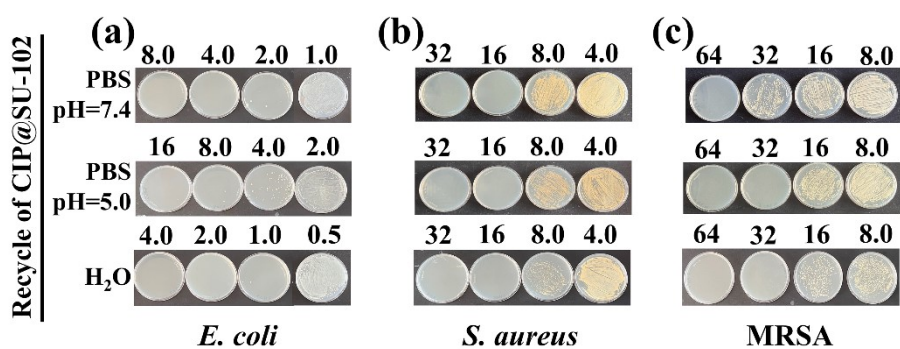

**Fig. S5** Plate photographs showing the antimicrobial performances of CIP@SU-102 after 20 days' CIP release.

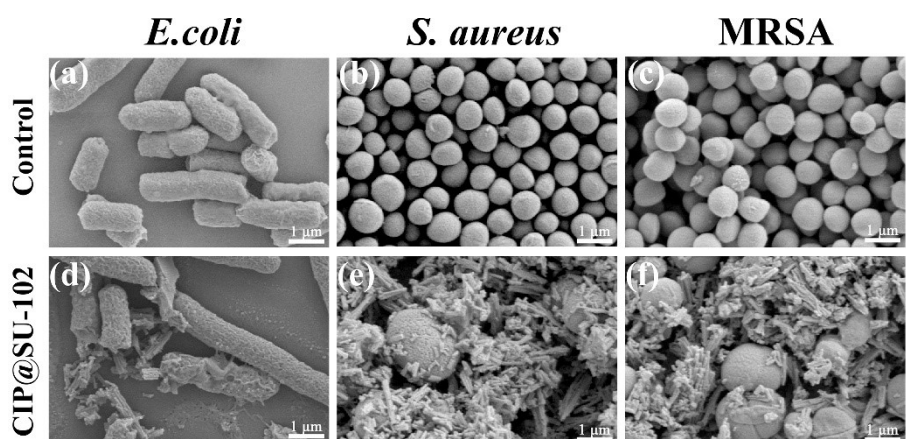

**Fig. S6** SEM images of bacteria before and after treating with CIP@SU-102.

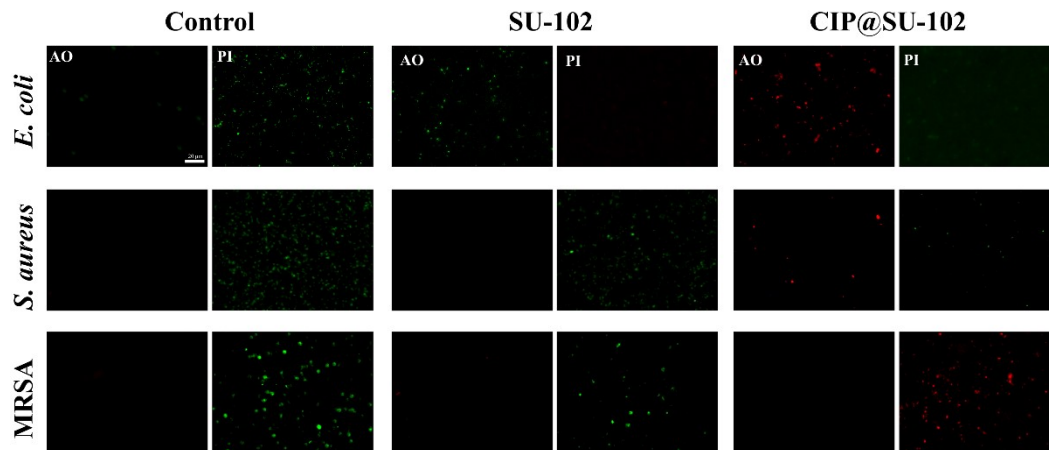

**Fig. S7** Fluorescence images (AO/PI images) of live/dead (green/red) bacteria under various treatments.

**Table S1** MBC values of as-prepared CIP@SU-102 against *E. coli*, *S. aureus*, and MRSA, respectively.

|                  | CIP@SU-102 | CIP@SU-102 after drug release |             |                  |
|------------------|------------|-------------------------------|-------------|------------------|
|                  |            | PBS, pH=7.4                   | PBS, pH=5.0 | H <sub>2</sub> O |
| <i>E. coli</i>   | 0.5        | 2.0                           | 8.0         | 1.0              |
| <i>S. aureus</i> | 8.0        | 16                            | 16          | 16               |
| MRSA             | 32         | 64                            | 32          | 32               |
